# Supplementary material for: Stochastic flux analysis of chemical reaction networks
Source: Springer Nature journal article supplement (doi:10.1186/1752-0509-7-133), 2013-01-01
Supplement: 12918_2012_1250_MOESM1_ESM.pdf [file 12918_2012_1250_MOESM1_ESM.pdf]

# Stochastic Flux Analysis of Chemical Reaction Networks

## Additional file

Ozan Kahramanoğulları<sup>\*,1</sup> James F. Lynch<sup>2</sup>

<sup>1</sup>The Microsoft Research - University of Trento Centre for Computational and Systems Biology, Trento, Italy

<sup>2</sup>Department of Computer Science, Clarkson University, Potsdam, NY, USA

Email: Ozan Kahramanoğulları<sup>\*</sup>- ozan@cosbi.eu;

<sup>\*</sup>Corresponding author

By relying on the Central Limit Theorem and assuming that flux is approximated by a normal distribution with unknown mean  $\mu$  and unknown variance  $\sigma^2$ , we use repeated simulations to estimate the mean and variance on the data given in Table 1, Table 2, and Table 3. We obtained the mean and variance values in Table 4, which result in the following observations:

1. The probability that the sample mean is within 0.1 standard deviation of the true mean is 0.383. The probability that the sample variance is within 0.1 standard deviation of the true variance is 0.5. Since these probabilities are independent, the probability that both the sample mean and variance are within 0.1 standard deviation of their true values is  $0.383 \times 0.5 = 0.1915$ .

2. The probability that the sample mean is within 0.2 standard deviation of the true mean is 0.6826. The probability that the sample variance is within 0.2 standard deviation of the true variance is 0.84. Since these probabilities are independent, the probability that both the sample mean and variance are within 0.2 standard deviation of their true values is 0.5734.

3. The probability that the sample mean is within 0.5 standard deviation of the true mean is 0.9876. The probability that the sample variance is within 0.5 standard deviation of the true variance is 0.9997. Since these probabilities are independent, the probability that both the sample mean and variance are within 0.5 standard deviation of their true values is 0.9874.

| Sims.                     | 1    | 2    | 3    | 4    | 5    | 6    | 7    | 8    | 9    | 10   | 11   | 12   | 13   | 14   | 15   | 16   | 17   | 18   | 19   | 20   | 21   | 22   | 23   | 24   | 25   |
|---------------------------|------|------|------|------|------|------|------|------|------|------|------|------|------|------|------|------|------|------|------|------|------|------|------|------|------|
| $11 \xrightarrow{A} 3$    | 132  | 115  | 132  | 128  | 136  | 117  | 122  | 133  | 133  | 127  | 137  | 134  | 116  | 134  | 131  | 122  | 120  | 124  | 135  | 124  | 140  | 126  | 124  | 131  | 117  |
| $21 \xrightarrow{E} 5$    | 143  | 134  | 154  | 143  | 141  | 146  | 119  | 142  | 142  | 140  | 160  | 158  | 124  | 135  | 133  | 144  | 122  | 138  | 138  | 133  | 142  | 133  | 125  | 147  | 133  |
| $21 \xrightarrow{E} 6$    | 1955 | 1982 | 1907 | 2131 | 2107 | 1960 | 2016 | 2003 | 1988 | 1974 | 1988 | 1955 | 2028 | 2009 | 2056 | 2037 | 2057 | 2037 | 2061 | 1997 | 1978 | 1989 | 1994 | 2035 | 1993 |
| $11 \xrightarrow{RD} 5$   | 125  | 125  | 137  | 129  | 129  | 134  | 110  | 130  | 127  | 127  | 145  | 138  | 107  | 127  | 126  | 133  | 116  | 127  | 130  | 123  | 136  | 130  | 122  | 132  | 125  |
| $20 \xrightarrow{RDA} 11$ | 131  | 115  | 132  | 127  | 135  | 118  | 121  | 132  | 133  | 127  | 137  | 133  | 116  | 134  | 131  | 123  | 120  | 124  | 135  | 124  | 139  | 127  | 124  | 132  | 118  |
| $5 \xrightarrow{RDE} 13$  | 154  | 134  | 147  | 134  | 122  | 139  | 136  | 143  | 145  | 131  | 139  | 148  | 126  | 142  | 120  | 133  | 125  | 153  | 133  | 136  | 131  | 130  | 127  | 152  | 132  |
| $13 \xrightarrow{RE} 16$  | 150  | 131  | 144  | 129  | 117  | 138  | 133  | 141  | 153  | 136  | 136  | 147  | 121  | 135  | 121  | 133  | 123  | 150  | 130  | 133  | 123  | 133  | 126  | 152  | 132  |
| $21 \xrightarrow{RT} 3$   | 132  | 115  | 132  | 129  | 136  | 117  | 122  | 133  | 133  | 127  | 137  | 135  | 116  | 133  | 131  | 121  | 120  | 124  | 135  | 124  | 140  | 126  | 124  | 133  | 117  |
| $21 \xrightarrow{RT} 6$   | 1958 | 1989 | 1911 | 2135 | 2112 | 1961 | 2016 | 2009 | 1991 | 1978 | 1992 | 1961 | 2035 | 2011 | 2060 | 2034 | 2065 | 2041 | 2065 | 2002 | 1984 | 1990 | 1995 | 2040 | 1998 |
| $3 \xrightarrow{RTA} 20$  | 132  | 115  | 131  | 128  | 136  | 118  | 122  | 132  | 133  | 126  | 138  | 133  | 116  | 135  | 132  | 122  | 120  | 123  | 135  | 124  | 140  | 126  | 123  | 133  | 117  |
| $6 \xrightarrow{RTE} 21$  | 1951 | 1994 | 1930 | 2141 | 2109 | 1959 | 2029 | 2014 | 1986 | 1976 | 1984 | 1965 | 2037 | 2019 | 2049 | 2037 | 2065 | 2048 | 2062 | 2001 | 1983 | 1998 | 1984 | 2025 | 2002 |
| $16 \xrightarrow{RTE} 21$ | 160  | 149  | 157  | 136  | 134  | 146  | 143  | 145  | 153  | 148  | 153  | 164  | 131  | 143  | 132  | 140  | 133  | 157  | 143  | 146  | 132  | 147  | 135  | 164  | 137  |

Table 1: Flux configuration of 25 simulations with the Rho GTP-binding proteins network with 1 A at the initial state and a cut-off value of 0.1.

| Sims.                     | 1   | 2   | 3   | 4   | 5   | 6   | 7   | 8   | 9   | 10  | 11  | 12  | 13  | 14  | 15  | 16  | 17  | 18  | 19  | 20  | 21  | 22  | 23  | 24  | 25  |
|---------------------------|-----|-----|-----|-----|-----|-----|-----|-----|-----|-----|-----|-----|-----|-----|-----|-----|-----|-----|-----|-----|-----|-----|-----|-----|-----|
| $11 \xrightarrow{A} 2$    | 157 | 166 | 150 | 174 | 154 | 159 | 184 | 152 | 185 | 153 | 155 | 151 | 169 | 162 | 140 | 156 | 192 | 159 | 178 | 156 | 151 | 157 | 179 | 170 | 151 |
| $11 \xrightarrow{A} 3$    | 126 | 123 | 119 | 105 | 126 | 123 | 110 | 124 | 119 | 114 | 122 | 125 | 123 | 120 | 111 | 115 | 106 | 118 | 104 | 121 | 125 | 120 | 125 | 109 | 118 |
| $21 \xrightarrow{E} 5$    | 111 | 124 | 96  | 130 | 120 | 120 | 114 | 110 | 123 | 110 | 115 | 106 | 116 | 113 | 125 | 129 | 127 | 122 | 129 | 116 | 114 | 115 | 100 | 118 | 112 |
| $21 \xrightarrow{E} 6$    | 104 | 103 | 132 | 119 | 112 | 127 | 120 | 133 | 98  | 133 | 122 | 115 | 120 | 111 | 113 | 123 | 119 | 109 | 117 | 147 | 123 | 125 | 122 | 112 | 118 |
| $11 \xrightarrow{RD} 2$   | 156 | 162 | 149 | 170 | 152 | 158 | 182 | 150 | 182 | 147 | 155 | 150 | 167 | 162 | 138 | 155 | 191 | 156 | 177 | 154 | 150 | 156 | 180 | 167 | 147 |
| $11 \xrightarrow{RD} 5$   | 112 | 124 | 99  | 127 | 120 | 124 | 115 | 111 | 125 | 111 | 117 | 106 | 119 | 116 | 122 | 128 | 131 | 125 | 127 | 118 | 117 | 121 | 103 | 123 | 113 |
| $2 \xrightarrow{RDA} 11$  | 160 | 162 | 153 | 171 | 153 | 156 | 186 | 147 | 182 | 152 | 155 | 150 | 170 | 165 | 141 | 156 | 195 | 162 | 173 | 155 | 154 | 151 | 177 | 167 | 153 |
| $20 \xrightarrow{RDA} 11$ | 123 | 123 | 116 | 107 | 125 | 125 | 107 | 128 | 120 | 113 | 121 | 128 | 123 | 120 | 109 | 116 | 104 | 116 | 104 | 120 | 124 | 121 | 124 | 110 | 117 |
| $5 \xrightarrow{RDE} 13$  | 121 | 123 | 105 | 136 | 108 | 120 | 107 | 124 | 125 | 108 | 123 | 144 | 106 | 131 | 104 | 110 | 104 | 118 | 122 | 130 | 108 | 115 | 116 | 122 | 127 |
| $13 \xrightarrow{RE} 16$  | 118 | 119 | 101 | 126 | 123 | 119 | 112 | 126 | 122 | 106 | 118 | 144 | 109 | 127 | 91  | 108 | 96  | 111 | 119 | 119 | 114 | 109 | 119 | 117 | 132 |
| $21 \xrightarrow{RT} 3$   | 126 | 123 | 119 | 105 | 126 | 122 | 110 | 124 | 117 | 114 | 121 | 124 | 123 | 120 | 111 | 115 | 106 | 118 | 104 | 121 | 125 | 119 | 124 | 107 | 118 |
| $21 \xrightarrow{RT} 6$   | 103 | 105 | 137 | 121 | 115 | 129 | 123 | 136 | 99  | 135 | 126 | 116 | 121 | 115 | 119 | 123 | 121 | 113 | 122 | 151 | 126 | 126 | 123 | 116 | 120 |
| $3 \xrightarrow{RTA} 20$  | 125 | 125 | 119 | 106 | 125 | 122 | 110 | 124 | 121 | 114 | 120 | 126 | 122 | 120 | 111 | 116 | 106 | 119 | 104 | 121 | 126 | 120 | 122 | 110 | 118 |
| $6 \xrightarrow{RTE} 21$  | 107 | 109 | 139 | 126 | 117 | 129 | 124 | 135 | 101 | 127 | 124 | 117 | 117 | 106 | 119 | 123 | 123 | 112 | 123 | 149 | 122 | 126 | 123 | 119 | 119 |
| $16 \xrightarrow{RTE} 21$ | 109 | 117 | 115 | 133 | 125 | 127 | 113 | 120 | 124 | 114 | 126 | 143 | 106 | 110 | 90  | 114 | 92  | 115 | 130 | 125 | 109 | 114 | 128 | 120 | 129 |

Table 2: Flux configuration of 25 simulations with the Rho GTP-binding proteins network with 10 A at the initial state and a cut-off value of 0.1.

| Sims.                     | 1    | 2    | 3    | 4    | 5    | 6    | 7    | 8    | 9    | 10   | 11   | 12   | 13   | 14   | 15   | 16   | 17   | 18   | 19   | 20   | 21   | 22   | 23   | 24   | 25   |
|---------------------------|------|------|------|------|------|------|------|------|------|------|------|------|------|------|------|------|------|------|------|------|------|------|------|------|------|
| $11 \xrightarrow{A} 2$    | 2612 | 2606 | 2614 | 2633 | 2616 | 2636 | 2673 | 2681 | 2623 | 2743 | 2696 | 2658 | 2582 | 2657 | 2708 | 2590 | 2749 | 2728 | 2618 | 2668 | 2614 | 2625 | 2608 | 2642 | 2619 |
| $11 \xrightarrow{A} 3$    | 146  | 175  | 164  | 139  | 134  | 151  | 130  | 158  | 144  | 169  | 142  | 164  | 150  | 141  | 153  | 137  | 146  | 142  | 145  | 165  | 136  | 137  | 138  | 154  | 133  |
| $21 \xrightarrow{E} 5$    | 139  | 120  | 142  | 162  | 144  | 151  | 141  | 152  | 156  | 158  | 138  | 151  | 154  | 166  | 168  | 165  | 145  | 140  | 147  | 135  | 147  | 161  | 131  | 130  | 143  |
| $11 \xrightarrow{RD} 2$   | 2610 | 2600 | 2611 | 2630 | 2617 | 2630 | 2671 | 2678 | 2618 | 2738 | 2695 | 2654 | 2580 | 2657 | 2709 | 2591 | 2745 | 2725 | 2615 | 2667 | 2609 | 2623 | 2600 | 2640 | 2617 |
| $11 \xrightarrow{RD} 5$   | 149  | 129  | 155  | 171  | 156  | 168  | 150  | 161  | 166  | 167  | 151  | 166  | 165  | 171  | 178  | 170  | 157  | 156  | 156  | 146  | 159  | 177  | 137  | 140  | 157  |
| $2 \xrightarrow{RDA} 11$  | 2608 | 2603 | 2626 | 2653 | 2619 | 2639 | 2673 | 2691 | 2626 | 2744 | 2704 | 2659 | 2588 | 2667 | 2724 | 2589 | 2756 | 2718 | 2624 | 2659 | 2621 | 2622 | 2590 | 2642 | 2611 |
| $20 \xrightarrow{RDA} 11$ | 144  | 179  | 164  | 135  | 135  | 157  | 126  | 154  | 142  | 167  | 140  | 165  | 149  | 138  | 153  | 133  | 145  | 144  | 139  | 165  | 135  | 140  | 139  | 155  | 131  |
| $5 \xrightarrow{RDE} 13$  | 180  | 168  | 141  | 153  | 153  | 142  | 155  | 150  | 142  | 157  | 133  | 154  | 145  | 139  | 134  | 138  | 158  | 143  | 162  | 166  | 145  | 149  | 157  | 142  | 138  |
| $13 \xrightarrow{RE} 16$  | 167  | 165  | 139  | 135  | 158  | 145  | 146  | 155  | 141  | 163  | 143  | 140  | 142  | 140  | 144  | 137  | 154  | 135  | 152  | 153  | 142  | 137  | 157  | 143  | 139  |
| $21 \xrightarrow{RT} 3$   | 145  | 175  | 160  | 136  | 132  | 150  | 130  | 158  | 143  | 169  | 142  | 163  | 148  | 140  | 153  | 136  | 146  | 140  | 144  | 164  | 136  | 136  | 137  | 152  | 130  |
| $3 \xrightarrow{RTA} 20$  | 146  | 175  | 162  | 137  | 134  | 153  | 129  | 156  | 143  | 169  | 140  | 162  | 151  | 139  | 152  | 136  | 146  | 142  | 145  | 165  | 136  | 137  | 138  | 154  | 133  |
| $16 \xrightarrow{RTE} 21$ | 164  | 163  | 152  | 135  | 148  | 152  | 140  | 155  | 151  | 168  | 141  | 142  | 146  | 137  | 149  | 147  | 154  | 136  | 149  | 163  | 146  | 128  | 158  | 139  | 140  |

Table 3: Flux configuration of 25 simulations with the Rho GTP-binding proteins network with 100 A at the initial state and a cut-off value of 0.1.

|      |            |                          |                          |                         |                         |                          |                          |                           |                           |
|------|------------|--------------------------|--------------------------|-------------------------|-------------------------|--------------------------|--------------------------|---------------------------|---------------------------|
|      |            | $11 \xrightarrow{A} 2$   | $11 \xrightarrow{A} 3$   | $21 \xrightarrow{E} 5$  | $21 \xrightarrow{E} 6$  | $11 \xrightarrow{RD} 2$  | $11 \xrightarrow{RD} 5$  | $2 \xrightarrow{RDA} 11$  | $20 \xrightarrow{RDA} 11$ |
| 1A   | $\mu$      | NA                       | 127.6                    | 138.76                  | 2009.48                 | NA                       | 127.6                    | NA                        | 127.52                    |
|      | $\sigma^2$ | NA                       | 50.                      | 100.9824                | 2313.9296               | NA                       | 65.04                    | NA                        | 45.9296                   |
|      | $D$        | NA                       | 0.3918                   | 0.7277                  | 1.1515                  | NA                       | 0.5097                   | NA                        | 0.3601                    |
|      | $c_v$      | NA                       | 18.0453                  | 13.8083                 | 41.7742                 | NA                       | 15.8219                  | NA                        | 18.8162                   |
| 10A  | $\mu$      | 162.4                    | 118.04                   | 116.6                   | 119.08                  | 160.52                   | 118.16                   | 161.84                    | 117.76                    |
|      | $\sigma^2$ | 166.08                   | 45.9584                  | 72.                     | 109.5136                | 170.4896                 | 62.3744                  | 164.0544                  | 51.6224                   |
|      | $D$        | 1.0226                   | 0.3893                   | 0.6174                  | 0.9196                  | 1.0621                   | 0.5278                   | 1.0136                    | 0.4383                    |
|      | $c_v$      | 12.6016                  | 17.4119                  | 13.7414                 | 11.3790                 | 12.2936                  | 14.9612                  | 12.6354                   | 16.3899                   |
| 100A | $\mu$      | 2647.96                  | 147.72                   | 147.44                  | NA                      | 2645.2                   | 158.32                   | 2650.24                   | 146.96                    |
|      | $\sigma^2$ | 2113.6384                | 144.3616                 | 142.0864                | NA                      | 2125.68                  | 143.0176                 | 2280.5824                 | 171.7184                  |
|      | $D$        | 0.7982                   | 0.9772                   | 0.9636                  | NA                      | 0.8035                   | 0.9033                   | 0.8605                    | 1.1684                    |
|      | $c_v$      | 57.5964                  | 12.2945                  | 12.3691                 | NA                      | 57.3732                  | 13.2385                  | 55.4960                   | 11.2147                   |
|      |            | $5 \xrightarrow{RDE} 13$ | $13 \xrightarrow{RE} 16$ | $21 \xrightarrow{RT} 3$ | $21 \xrightarrow{RT} 6$ | $3 \xrightarrow{RTA} 20$ | $6 \xrightarrow{RTE} 21$ | $16 \xrightarrow{RTE} 21$ |                           |
| 1A   | $\mu$      | 136.48                   | 134.68                   | 127.68                  | 2013.32                 | 127.6                    | 2013.92                  | 145.12                    |                           |
|      | $\sigma^2$ | 87.7696                  | 100.7776                 | 51.3376                 | 2334.7776               | 51.12                    | 2251.1136                | 98.9856                   |                           |
|      | $D$        | 0.6430                   | 0.7482                   | 0.4020                  | 1.1596                  | 0.4006                   | 1.1177                   | 0.6820                    |                           |
|      | $c_v$      | 14.5679                  | 13.4159                  | 17.8198                 | 41.6667                 | 17.8465                  | 42.4466                  | 14.5861                   |                           |
| 10A  | $\mu$      | 118.28                   | 116.2                    | 117.68                  | 121.64                  | 118.08                   | 121.44                   | 117.92                    |                           |
|      | $\sigma^2$ | 111.0016                 | 122.24                   | 45.6576                 | 118.9504                | 42.8736                  | 103.6064                 | 136.9536                  |                           |
|      | $D$        | 0.9384                   | 1.0519                   | 0.3879                  | 0.9778                  | 0.3630                   | 0.8531                   | 1.1614                    |                           |
|      | $c_v$      | 11.2265                  | 10.5099                  | 17.4159                 | 11.1530                 | 18.0335                  | 11.9307                  | 10.0762                   |                           |
| 100A | $\mu$      | 149.76                   | 146.88                   | 146.6                   | NA                      | 147.2                    | NA                       | 148.12                    |                           |
|      | $\sigma^2$ | 126.8224                 | 88.8256                  | 148.4                   | NA                      | 144.8                    | NA                       | 98.8256                   |                           |
|      | $D$        | 0.8468                   | 0.6047                   | 1.0122                  | NA                      | 0.9836                   | NA                       | 0.6671                    |                           |
|      | $c_v$      | 13.2983                  | 15.5845                  | 12.0341                 | NA                      | 12.2327                  | NA                       | 14.8997                   |                           |

Table 4: Sample mean ( $\mu$ ) and variance ( $\sigma$ ) of the stochastic fluxes  $\mu$  with a cut-off value of 0.1 on a sample of 25 simulations, together with their index of dispersion ( $D = \sigma^2/\mu$ ) and coefficient of variation ( $c_v = \mu/\sigma$ ).
