# Supplementary material for: Stochastic flux analysis of chemical reaction networks
Source: Springer Nature journal article supplement (doi:10.1186/1752-0509-7-133), 2013-01-01
Supplement: 12918_2012_1250_MOESM2_ESM.pdf [file 12918_2012_1250_MOESM2_ESM.pdf]

$\langle$  (1, {A(1)}, {P(2), P(3)}, 0.46);  
 (3, {P(3)}, {C(4)}, 0.73);  
 (2, {P(2)}, {B(5)}, 1.13);  
 (4, {B(5), C(4)}, {D(6)}, 1.86)  $\rangle$

Sim. Trajectory

$\rightsquigarrow$

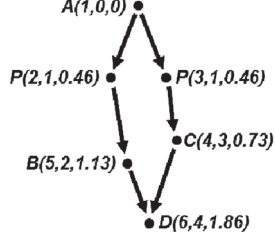

Sim. Trace

$\rightsquigarrow$

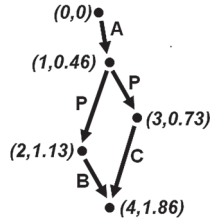

Sim. Configuration
