# Supplementary material for: Stochastic flux analysis of chemical reaction networks
Source: Springer Nature journal article supplement (doi:10.1186/1752-0509-7-133), 2013-01-01

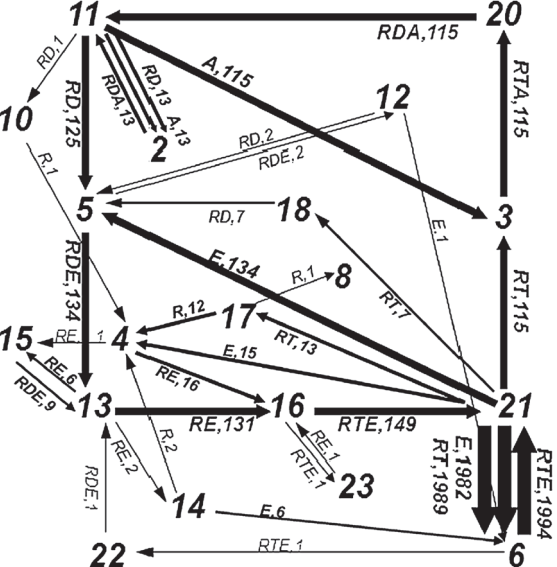

$\rightsquigarrow$

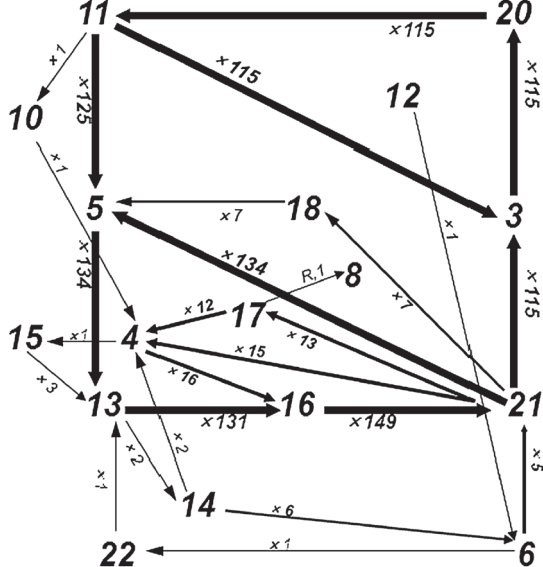

Supplement: 12918_2012_1250_MOESM7_ESM.pdf [file 12918_2012_1250_MOESM7_ESM.pdf]
