# Supplementary material for: Stochastic flux analysis of chemical reaction networks
Source: Springer Nature journal article supplement (doi:10.1186/1752-0509-7-133), 2013-01-01

$A_0 = 1,$   
 $\mathcal{N}[2, 2.5](0.4)$

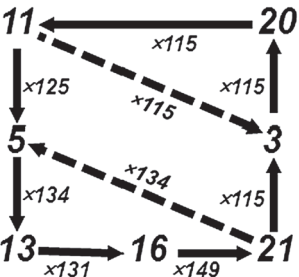

$A_0 = 10,$   
 $\mathcal{N}[1.7, 1.8](0.2)$

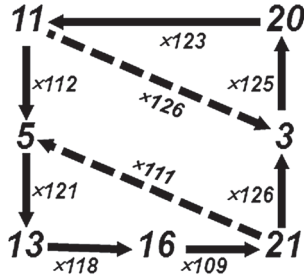

$A_0 = 100,$   
 $\mathcal{N}[0.3, 0.4](0.2)$

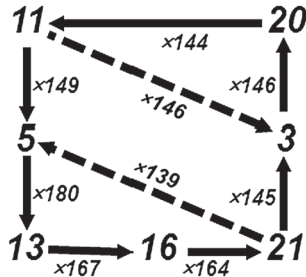

Supplement: 12918_2012_1250_MOESM8_ESM.pdf [file 12918_2012_1250_MOESM8_ESM.pdf]
