# Supplementary material for: Stochastic flux analysis of chemical reaction networks
Source: Springer Nature journal article supplement (doi:10.1186/1752-0509-7-133), 2013-01-01
Supplement: 12918_2012_1250_MOESM13_ESM.pdf [file 12918_2012_1250_MOESM13_ESM.pdf]

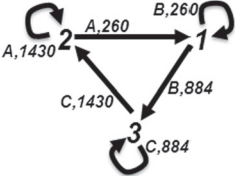

$$\mathcal{F}[0.0224, 0.0274]$$

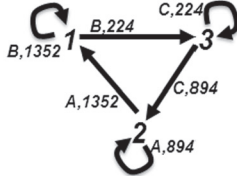

$$\mathcal{F}[0.0160, 0.0208]$$

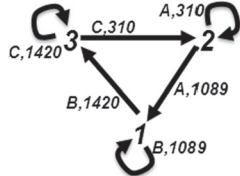

$$\mathcal{F}[0.0187, 0.0242]$$
