# Supplementary material for: Stochastic flux analysis of chemical reaction networks
Source: Springer Nature journal article supplement (doi:10.1186/1752-0509-7-133), 2013-01-01
Supplement: 12918_2012_1250_MOESM14_ESM.pdf [file 12918_2012_1250_MOESM14_ESM.pdf]

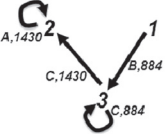

$$\mathcal{F}[0.0176, 0.0224]$$

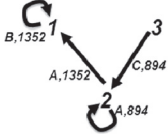

$$\mathcal{F}[0.0208, 0.0258]$$

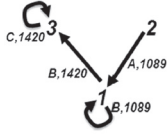

$$\mathcal{F}[0.0242, 0.0288]$$
