# Supplementary material for: Stochastic flux analysis of chemical reaction networks
Source: Springer Nature journal article supplement (doi:10.1186/1752-0509-7-133), 2013-01-01
Supplement: 12918_2012_1250_MOESM16_ESM.pdf [file 12918_2012_1250_MOESM16_ESM.pdf]

- 1 : Filter\_Feeder  $\xrightarrow{41.4697}$  2 : Dep\_Detritus  $\xrightarrow{0.0062}$  3 : Dep\_Detritus  $\xrightarrow{0.0006}$  Dep\_Feeder
- 4 : Dep\_Detritus  $\xrightarrow{0.0073}$  Meiofauna 5 : Dep\_Detritus  $\xrightarrow{0.0082}$  Microbiota 6 : Dep\_Feeder  $\xrightarrow{0.0264}$
- 7 : Dep\_Feeder  $\xrightarrow{0.1172}$  Dep\_Detritus 8 : Dep\_Feeder  $\xrightarrow{0.0106}$  Predator 9 : Filter\_Feeder  $\xrightarrow{0.0126}$
- 10 : Filter\_Feeder  $\xrightarrow{0.0079}$  Dep\_Detritus 11 : Filter\_Feeder  $\xrightarrow{0.0003}$  Predator 12 : Meiofauna  $\xrightarrow{0.1484}$
- 13 : Meiofauna  $\xrightarrow{0.1758}$  Dep\_Detritus 14 : Meiofauna  $\xrightarrow{0.0274}$  Dep\_Feeder 15 : Microbiota  $\xrightarrow{2.3880}$
- 16 : Microbiota  $\xrightarrow{0.5}$  Dep\_Feeder 17 : Microbiota  $\xrightarrow{0.5}$  Meiofauna 18 : Predator  $\xrightarrow{0.0052}$
- 19 : Predator  $\xrightarrow{0.0047}$  Dep\_Detritus

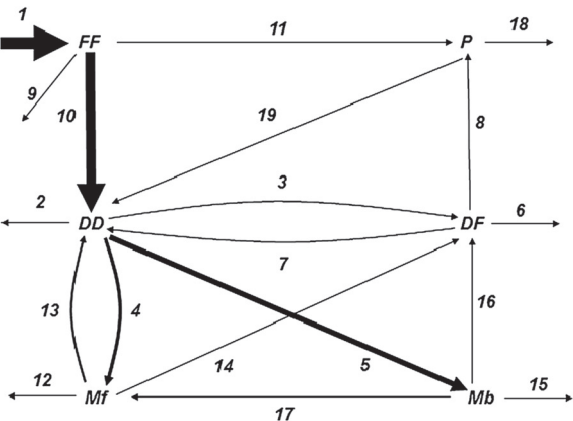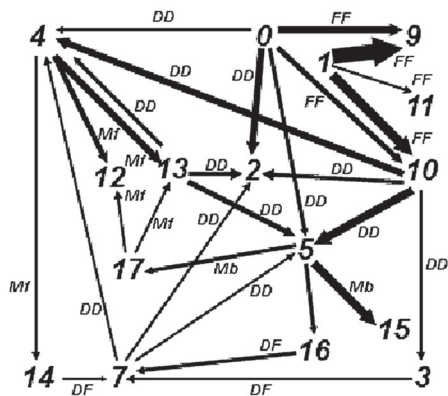

- [6000.6100]  
 [3700.3800]  
 [1500.1750]  
 [1190.1220]  
 [1020.1050]  
 [770.840]  
 [330.400]  
 [235.280]  
 [110.180]
